# Supplementary material
Source: Springer Nature journal article supplement (https://www.springermedizin.de/resource/supplementary/12891_2012_1822_MOESM4_ESM.pdf/9508560)

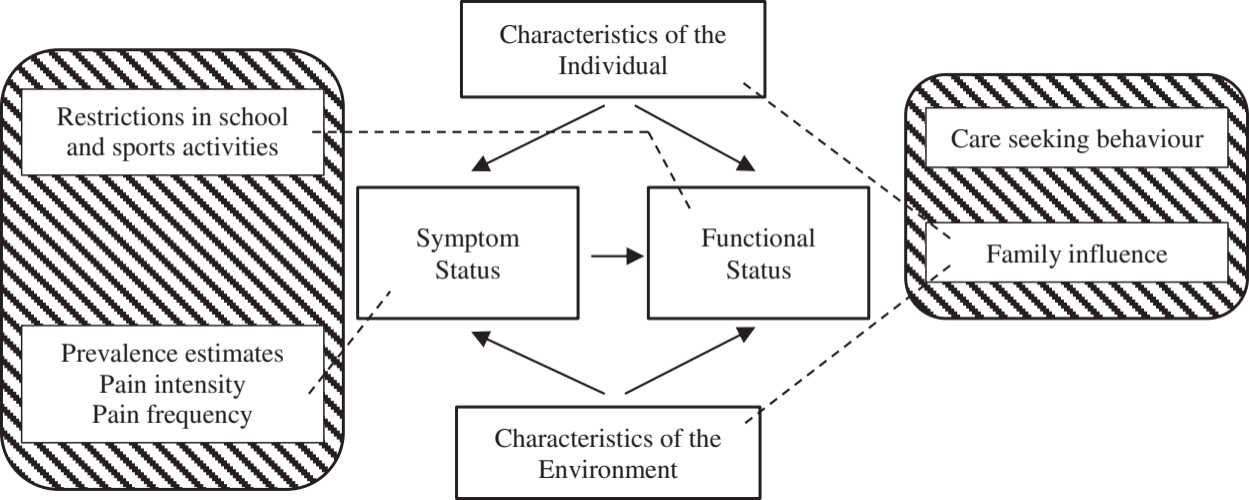

Supplement: MOESM4 [file 9508560]
